# Supplementary material for: Dosage Transmission Disequilibrium Test (dTDT) for Linkage and Association Detection
Source: PLoS One. 2013 May 14;8(5):e63526. doi: 10.1371/journal.pone.0063526 (PMC3653954; doi:10.1371/journal.pone.0063526)
Supplement: Table S2 — Dominant (K = 0.1). (XLSX) [file pone.0063526.s002.xlsx]

## Sheet: dominant_0.1
R	p1	p2	q1	q2	f11	f12	f22	trios	chisq	pVal
0.5	0.7071	0.2929	0.7071	0.2929	0.09	0.11	0.11	1000	4.91422	0.0154196
0.5	0.9877	0.0123	0.9877	0.0123	0.09	0.5	0.5	1000	31.5266	1.01314e-08
0.5	0.9918	0.0082	0.9918	0.0082	0.09	0.7	0.7	1000	29.1734	3.41577e-08
0.5	0.9938	0.0062	0.9938	0.0062	0.09	0.9	0.9	1000	38.6848	2.55172e-10
0.5	0.9945	0.0055	0.9945	0.0055	0.09	1	1	1000	27.8716	6.70031e-08
0.5	0.5	0.5	0.5	0.5	0.07	0.11	0.11	1000	6.724	0.00533333
0.5	0.9645	0.0355	0.9645	0.0355	0.07	0.5	0.5	1000	66.3985	1.86886e-16
0.5	0.9759	0.0241	0.9759	0.0241	0.07	0.7	0.7	1000	83.7453	2.84685e-20
0.5	0.9818	0.0182	0.9818	0.0182	0.07	0.9	0.9	1000	115.678	2.81983e-27
0.5	0.9837	0.0163	0.9837	0.0163	0.07	1	1	1000	93.1869	2.4041e-22
0.5	0.4082	0.5918	0.4082	0.5918	0.05	0.11	0.11	1000	12.0967	0.0002709
0.5	0.9428	0.0572	0.9428	0.0572	0.05	0.5	0.5	1000	130.638	1.4966e-30
0.5	0.9608	0.0392	0.9608	0.0392	0.05	0.7	0.7	1000	149.003	1.44146e-34
0.5	0.9701	0.0299	0.9701	0.0299	0.05	0.9	0.9	1000	162.79	1.3987e-37
0.5	0.9733	0.0267	0.9733	0.0267	0.05	1	1	1000	199.218	1.55489e-45
0.5	0.3536	0.6464	0.3536	0.6464	0.03	0.11	0.11	1000	8.11874	0.00241659
0.5	0.9225	0.0775	0.9225	0.0775	0.03	0.5	0.5	1000	166.337	2.34819e-38
0.5	0.9463	0.0537	0.9463	0.0537	0.03	0.7	0.7	1000	232.436	8.80803e-53
0.5	0.9589	0.0411	0.9589	0.0411	0.03	0.9	0.9	1000	246.161	8.9578e-56
0.5	0.9632	0.0368	0.9632	0.0368	0.03	1	1	1000	262.652	2.27504e-59
0.5	0.3162	0.6838	0.3162	0.6838	0.01	0.11	0.11	1000	12.3289	0.00023893
0.5	0.9035	0.0965	0.9035	0.0965	0.01	0.5	0.5	1000	231.368	1.50596e-52
0.5	0.9325	0.0675	0.9325	0.0675	0.01	0.7	0.7	1000	276.494	2.18874e-62
0.5	0.9481	0.0519	0.9481	0.0519	0.01	0.9	0.9	1000	316.457	4.29622e-71
0.5	0.9535	0.0465	0.9535	0.0465	0.01	1	1	1000	311.603	4.90146e-70
0.5	0.3015	0.6985	0.3015	0.6985	0	0.11	0.11	1000	12.1639	0.000261219
0.5	0.8944	0.1056	0.8944	0.1056	0	0.5	0.5	1000	267.672	1.83157e-60
0.5	0.9258	0.0742	0.9258	0.0742	0	0.7	0.7	1000	303.145	3.41241e-68
0.5	0.9428	0.0572	0.9428	0.0572	0	0.9	0.9	1000	362.281	4.49904e-81
0.5	0.9487	0.0513	0.9487	0.0513	0	1	1	1000	363.263	2.74966e-81
0.7	0.7071	0.2929	0.7071	0.2929	0.09	0.11	0.11	1000	1.69937	0.130844
0.7	0.9877	0.0123	0.9877	0.0123	0.09	0.5	0.5	1000	54.5252	7.80927e-14
0.7	0.9918	0.0082	0.9918	0.0082	0.09	0.7	0.7	1000	26.6363	1.27106e-07
0.7	0.9938	0.0062	0.9938	0.0062	0.09	0.9	0.9	1000	47.9699	2.20742e-12
0.7	0.9945	0.0055	0.9945	0.0055	0.09	1	1	1000	44.236	1.48694e-11
0.7	0.5	0.5	0.5	0.5	0.07	0.11	0.11	1000	2.809	0.0584343
0.7	0.9645	0.0355	0.9645	0.0355	0.07	0.5	0.5	1000	125.681	1.82004e-29
0.7	0.9759	0.0241	0.9759	0.0241	0.07	0.7	0.7	1000	155.869	4.54961e-36
0.7	0.9818	0.0182	0.9818	0.0182	0.07	0.9	0.9	1000	154.691	8.23201e-36
0.7	0.9837	0.0163	0.9837	0.0163	0.07	1	1	1000	174.424	4.02191e-40
0.7	0.4082	0.5918	0.4082	0.5918	0.05	0.11	0.11	1000	13.7499	0.000111173
0.7	0.9428	0.0572	0.9428	0.0572	0.05	0.5	0.5	1000	204.375	1.16445e-46
0.7	0.9608	0.0392	0.9608	0.0392	0.05	0.7	0.7	1000	227.112	1.27645e-51
0.7	0.9701	0.0299	0.9701	0.0299	0.05	0.9	0.9	1000	263.162	1.76133e-59
0.7	0.9733	0.0267	0.9733	0.0267	0.05	1	1	1000	255.225	9.46114e-58
0.7	0.3536	0.6464	0.3536	0.6464	0.03	0.11	0.11	1000	10.3935	0.000684853
0.7	0.9225	0.0775	0.9225	0.0775	0.03	0.5	0.5	1000	305.933	8.42522e-69
0.7	0.9463	0.0537	0.9463	0.0537	0.03	0.7	0.7	1000	347.251	8.43424e-78
0.7	0.9589	0.0411	0.9589	0.0411	0.03	0.9	0.9	1000	370.543	7.14515e-83
0.7	0.9632	0.0368	0.9632	0.0368	0.03	1	1	1000	395.179	3.09399e-88
0.7	0.3162	0.6838	0.3162	0.6838	0.01	0.11	0.11	1000	10.646	0.000596444
0.7	0.9035	0.0965	0.9035	0.0965	0.01	0.5	0.5	1000	374.101	1.20092e-83
0.7	0.9325	0.0675	0.9325	0.0675	0.01	0.7	0.7	1000	432.856	1.94605e-96
0.7	0.9481	0.0519	0.9481	0.0519	0.01	0.9	0.9	1000	502.382	1.44374e-111
0.7	0.9535	0.0465	0.9535	0.0465	0.01	1	1	1000	496.089	3.3782e-110
0.7	0.3015	0.6985	0.3015	0.6985	0	0.11	0.11	1000	12.1692	0.000260482
0.7	0.8944	0.1056	0.8944	0.1056	0	0.5	0.5	1000	408.404	4.08821e-91
0.7	0.9258	0.0742	0.9258	0.0742	0	0.7	0.7	1000	486.365	4.41129e-108
0.7	0.9428	0.0572	0.9428	0.0572	0	0.9	0.9	1000	525.671	1.23779e-116
0.7	0.9487	0.0513	0.9487	0.0513	0	1	1	1000	528.747	2.65043e-117
0.9	0.7071	0.2929	0.7071	0.2929	0.09	0.11	0.11	1000	3.29074	0.0424315
0.9	0.9877	0.0123	0.9877	0.0123	0.09	0.5	0.5	1000	53.6393	1.22616e-13
0.9	0.9918	0.0082	0.9918	0.0082	0.09	0.7	0.7	1000	64.4983	4.90362e-16
0.9	0.9938	0.0062	0.9938	0.0062	0.09	0.9	0.9	1000	67.963	8.44903e-17
0.9	0.9945	0.0055	0.9945	0.0055	0.09	1	1	1000	64.1163	5.95329e-16
0.9	0.5	0.5	0.5	0.5	0.07	0.11	0.11	1000	5.776	0.00924387
0.9	0.9645	0.0355	0.9645	0.0355	0.07	0.5	0.5	1000	180.338	2.05541e-41
0.9	0.9759	0.0241	0.9759	0.0241	0.07	0.7	0.7	1000	179.746	2.76827e-41
0.9	0.9818	0.0182	0.9818	0.0182	0.07	0.9	0.9	1000	210.366	5.74018e-48
0.9	0.9837	0.0163	0.9837	0.0163	0.07	1	1	1000	222.779	1.12485e-50
0.9	0.4082	0.5918	0.4082	0.5918	0.05	0.11	0.11	1000	9.7166	0.000993619
0.9	0.9428	0.0572	0.9428	0.0572	0.05	0.5	0.5	1000	301	1.00058e-67
0.9	0.9608	0.0392	0.9608	0.0392	0.05	0.7	0.7	1000	342.881	7.54422e-77
0.9	0.9701	0.0299	0.9701	0.0299	0.05	0.9	0.9	1000	377.446	2.24447e-84
0.9	0.9733	0.0267	0.9733	0.0267	0.05	1	1	1000	363.833	2.06568e-81
0.9	0.3536	0.6464	0.3536	0.6464	0.03	0.11	0.11	1000	12.2302	0.000252022
0.9	0.9225	0.0775	0.9225	0.0775	0.03	0.5	0.5	1000	396.54	1.56406e-88
0.9	0.9463	0.0537	0.9463	0.0537	0.03	0.7	0.7	1000	485.756	5.98486e-108
0.9	0.9589	0.0411	0.9589	0.0411	0.03	0.9	0.9	1000	491.794	2.90642e-109
0.9	0.9632	0.0368	0.9632	0.0368	0.03	1	1	1000	516.838	1.0334e-114
0.9	0.3162	0.6838	0.3162	0.6838	0.01	0.11	0.11	1000	22.0248	1.40229e-06
0.9	0.9035	0.0965	0.9035	0.0965	0.01	0.5	0.5	1000	544.169	1.17027e-120
0.9	0.9325	0.0675	0.9325	0.0675	0.01	0.7	0.7	1000	584.422	2.05061e-129
0.9	0.9481	0.0519	0.9481	0.0519	0.01	0.9	0.9	1000	645.042	1.33996e-142
0.9	0.9535	0.0465	0.9535	0.0465	0.01	1	1	1000	667.429	1.81248e-147
0.9	0.3015	0.6985	0.3015	0.6985	0	0.11	0.11	1000	22.7168	9.76876e-07
0.9	0.8944	0.1056	0.8944	0.1056	0	0.5	0.5	1000	578.788	3.44638e-128
0.9	0.9258	0.0742	0.9258	0.0742	0	0.7	0.7	1000	656.756	3.79794e-145
0.9	0.9428	0.0572	0.9428	0.0572	0	0.9	0.9	1000	713.237	1.98078e-157
0.9	0.9487	0.0513	0.9487	0.0513	0	1	1	1000	723.142	1.38995e-159
1	0.7071	0.2929	0.7071	0.2929	0.09	0.11	0.11	1000	7.41309	0.00359897
1	0.9877	0.0123	0.9877	0.0123	0.09	0.5	0.5	1000	68.0398	8.12586e-17
1	0.9918	0.0082	0.9918	0.0082	0.09	0.7	0.7	1000	69.2227	4.45926e-17
1	0.9938	0.0062	0.9938	0.0062	0.09	0.9	0.9	1000	72.791	7.30294e-18
1	0.9945	0.0055	0.9945	0.0055	0.09	1	1	1000	77.6385	6.26449e-19
1	0.5	0.5	0.5	0.5	0.07	0.11	0.11	1000	12.544	0.000212714
1	0.9645	0.0355	0.9645	0.0355	0.07	0.5	0.5	1000	193.473	2.78877e-44
1	0.9759	0.0241	0.9759	0.0241	0.07	0.7	0.7	1000	233.339	5.5975e-53
1	0.9818	0.0182	0.9818	0.0182	0.07	0.9	0.9	1000	219.262	6.57942e-50
1	0.9837	0.0163	0.9837	0.0163	0.07	1	1	1000	253.686	2.04895e-57
1	0.4082	0.5918	0.4082	0.5918	0.05	0.11	0.11	1000	13.7499	0.000111173
1	0.9428	0.0572	0.9428	0.0572	0.05	0.5	0.5	1000	329.391	6.54094e-74
1	0.9608	0.0392	0.9608	0.0392	0.05	0.7	0.7	1000	385.107	4.82174e-86
1	0.9701	0.0299	0.9701	0.0299	0.05	0.9	0.9	1000	389.634	4.98539e-87
1	0.9733	0.0267	0.9733	0.0267	0.05	1	1	1000	419.97	1.24169e-93
1	0.3536	0.6464	0.3536	0.6464	0.03	0.11	0.11	1000	19.5794	5.05134e-06
1	0.9225	0.0775	0.9225	0.0775	0.03	0.5	0.5	1000	457.573	8.12692e-102
1	0.9463	0.0537	0.9463	0.0537	0.03	0.7	0.7	1000	514.823	2.83613e-114
1	0.9589	0.0411	0.9589	0.0411	0.03	0.9	0.9	1000	575.629	1.67683e-127
1	0.9632	0.0368	0.9632	0.0368	0.03	1	1	1000	579.405	2.53027e-128
1	0.3162	0.6838	0.3162	0.6838	0.01	0.11	0.11	1000	23.4016	6.83445e-07
1	0.9035	0.0965	0.9035	0.0965	0.01	0.5	0.5	1000	604.055	1.10026e-133
1	0.9325	0.0675	0.9325	0.0675	0.01	0.7	0.7	1000	685.414	2.22467e-151
1	0.9481	0.0519	0.9481	0.0519	0.01	0.9	0.9	1000	735.401	3.00171e-162
1	0.9535	0.0465	0.9535	0.0465	0.01	1	1	1000	747.217	8.09162e-165
1	0.3015	0.6985	0.3015	0.6985	0	0.11	0.11	1000	23.4326	6.72477e-07
1	0.8944	0.1056	0.8944	0.1056	0	0.5	0.5	1000	681.129	1.90126e-150
1	0.9258	0.0742	0.9258	0.0742	0	0.7	0.7	1000	758.536	2.79873e-167
1	0.9428	0.0572	0.9428	0.0572	0	0.9	0.9	1000	817.119	5.12395e-180
1	0.9487	0.0513	0.9487	0.0513	0	1	1	1000	826.477	4.73275e-182
