# Supplementary material for: Dosage Transmission Disequilibrium Test (dTDT) for Linkage and Association Detection
Source: PLoS One. 2013 May 14;8(5):e63526. doi: 10.1371/journal.pone.0063526 (PMC3653954; doi:10.1371/journal.pone.0063526)
Supplement: Table S6 — Recessive (K = 0.2). (XLSX) [file pone.0063526.s006.xlsx]

## Sheet: recessive_0.2
R	p1	p2	q1	q2	f11	f12	f22	trios	chisq	pVal
0.5	0.2929	0.7071	0.2929	0.7071	0.18	0.18	0.22	1000	2.41875	0.0765402
0.5	0.75	0.25	0.75	0.25	0.18	0.18	0.5	1000	7.905	0.00272527
0.5	0.8039	0.1961	0.8039	0.1961	0.18	0.18	0.7	1000	12.0773	0.000273756
0.5	0.8333	0.1667	0.8333	0.1667	0.18	0.18	0.9	1000	7.17326	0.00412476
0.5	0.8438	0.1562	0.8438	0.1562	0.18	0.18	1	1000	7.39443	0.00363729
0.5	0.134	0.866	0.134	0.866	0.14	0.14	0.22	1000	6.09356	0.00767847
0.5	0.5918	0.4082	0.5918	0.4082	0.14	0.14	0.5	1000	41.0654	7.53225e-11
0.5	0.6727	0.3273	0.6727	0.3273	0.14	0.14	0.7	1000	50.6514	5.62083e-13
0.5	0.719	0.281	0.719	0.281	0.14	0.14	0.9	1000	56.8368	2.40794e-14
0.5	0.7359	0.2641	0.7359	0.2641	0.14	0.14	1	1000	57.7856	1.48599e-14
0.5	0.0871	0.9129	0.0871	0.9129	0.1	0.1	0.22	1000	8.74296	0.0017044
0.5	0.5	0.5	0.5	0.5	0.1	0.1	0.5	1000	72.9	6.91055e-18
0.5	0.5918	0.4082	0.5918	0.4082	0.1	0.1	0.7	1000	90.4195	9.737e-22
0.5	0.6464	0.3536	0.6464	0.3536	0.1	0.1	0.9	1000	119.156	4.88146e-28
0.5	0.6667	0.3333	0.6667	0.3333	0.1	0.1	1	1000	119.31	4.51559e-28
0.5	0.0646	0.9354	0.0646	0.9354	0.06	0.06	0.22	1000	11.9017	0.000301083
0.5	0.4359	0.5641	0.4359	0.5641	0.06	0.06	0.5	1000	111.422	2.41181e-26
0.5	0.5323	0.4677	0.5323	0.4677	0.06	0.06	0.7	1000	147.486	3.09324e-34
0.5	0.5918	0.4082	0.5918	0.4082	0.06	0.06	0.9	1000	175.313	2.57181e-40
0.5	0.6141	0.3859	0.6141	0.3859	0.06	0.06	1	1000	201.801	4.24635e-46
0.5	0.0513	0.9487	0.0513	0.9487	0.02	0.02	0.22	1000	22.8865	8.94083e-07
0.5	0.3876	0.6124	0.3876	0.6124	0.02	0.02	0.5	1000	138.069	3.54539e-32
0.5	0.4855	0.5145	0.4855	0.5145	0.02	0.02	0.7	1000	184.826	2.15368e-42
0.5	0.5477	0.4523	0.5477	0.4523	0.02	0.02	0.9	1000	233.199	6.00604e-53
0.5	0.5714	0.4286	0.5714	0.4286	0.02	0.02	1	1000	259.358	1.18854e-58
0.5	0.0465	0.9535	0.0465	0.9535	0	0	0.22	1000	25.4119	2.40037e-07
0.5	0.3675	0.6325	0.3675	0.6325	0	0	0.5	1000	178.872	4.29557e-41
0.5	0.4655	0.5345	0.4655	0.5345	0	0	0.7	1000	233.236	5.89421e-53
0.5	0.5286	0.4714	0.5286	0.4714	0	0	0.9	1000	269.564	7.08662e-61
0.5	0.5528	0.4472	0.5528	0.4472	0	0	1	1000	264.074	1.11443e-59
0.7	0.2929	0.7071	0.2929	0.7071	0.18	0.18	0.22	1000	7.29744	0.00384331
0.7	0.75	0.25	0.75	0.25	0.18	0.18	0.5	1000	11.3166	0.000413696
0.7	0.8039	0.1961	0.8039	0.1961	0.18	0.18	0.7	1000	19.5147	5.22601e-06
0.7	0.8333	0.1667	0.8333	0.1667	0.18	0.18	0.9	1000	22.8433	9.14483e-07
0.7	0.8438	0.1562	0.8438	0.1562	0.18	0.18	1	1000	30.2281	1.98039e-08
0.7	0.134	0.866	0.134	0.866	0.14	0.14	0.22	1000	4.6958	0.0175944
0.7	0.5918	0.4082	0.5918	0.4082	0.14	0.14	0.5	1000	62.7193	1.21031e-15
0.7	0.6727	0.3273	0.6727	0.3273	0.14	0.14	0.7	1000	71.3014	1.55401e-17
0.7	0.719	0.281	0.719	0.281	0.14	0.14	0.9	1000	108.732	9.37075e-26
0.7	0.7359	0.2641	0.7359	0.2641	0.14	0.14	1	1000	118.023	8.64105e-28
0.7	0.0871	0.9129	0.0871	0.9129	0.1	0.1	0.22	1000	10.7654	0.000558754
0.7	0.5	0.5	0.5	0.5	0.1	0.1	0.5	1000	110.224	4.41504e-26
0.7	0.5918	0.4082	0.5918	0.4082	0.1	0.1	0.7	1000	167.512	1.30077e-38
0.7	0.6464	0.3536	0.6464	0.3536	0.1	0.1	0.9	1000	198.433	2.30586e-45
0.7	0.6667	0.3333	0.6667	0.3333	0.1	0.1	1	1000	222.369	1.38242e-50
0.7	0.0646	0.9354	0.0646	0.9354	0.06	0.06	0.22	1000	24.2014	4.50522e-07
0.7	0.4359	0.5641	0.4359	0.5641	0.06	0.06	0.5	1000	224.735	4.21112e-51
0.7	0.5323	0.4677	0.5323	0.4677	0.06	0.06	0.7	1000	250.933	8.15868e-57
0.7	0.5918	0.4082	0.5918	0.4082	0.06	0.06	0.9	1000	312.527	3.0845e-70
0.7	0.6141	0.3859	0.6141	0.3859	0.06	0.06	1	1000	338.097	8.30748e-76
0.7	0.0513	0.9487	0.0513	0.9487	0.02	0.02	0.22	1000	21.9549	1.45445e-06
0.7	0.3876	0.6124	0.3876	0.6124	0.02	0.02	0.5	1000	290.807	1.66399e-65
0.7	0.4855	0.5145	0.4855	0.5145	0.02	0.02	0.7	1000	405.731	1.5612e-90
0.7	0.5477	0.4523	0.5477	0.4523	0.02	0.02	0.9	1000	421.769	5.03889e-94
0.7	0.5714	0.4286	0.5714	0.4286	0.02	0.02	1	1000	447.436	1.30618e-99
0.7	0.0465	0.9535	0.0465	0.9535	0	0	0.22	1000	36.4347	8.09945e-10
0.7	0.3675	0.6325	0.3675	0.6325	0	0	0.5	1000	318.616	1.45439e-71
0.7	0.4655	0.5345	0.4655	0.5345	0	0	0.7	1000	409.93	1.90313e-91
0.7	0.5286	0.4714	0.5286	0.4714	0	0	0.9	1000	508.051	8.43467e-113
0.7	0.5528	0.4472	0.5528	0.4472	0	0	1	1000	540.741	6.51764e-120
0.9	0.2929	0.7071	0.2929	0.7071	0.18	0.18	0.22	1000	1.27561	0.186662
0.9	0.75	0.25	0.75	0.25	0.18	0.18	0.5	1000	20.1278	3.78726e-06
0.9	0.8039	0.1961	0.8039	0.1961	0.18	0.18	0.7	1000	26.3007	1.51289e-07
0.9	0.8333	0.1667	0.8333	0.1667	0.18	0.18	0.9	1000	40.6612	9.26534e-11
0.9	0.8438	0.1562	0.8438	0.1562	0.18	0.18	1	1000	28.2183	5.59916e-08
0.9	0.134	0.866	0.134	0.866	0.14	0.14	0.22	1000	11.8663	0.000306923
0.9	0.5918	0.4082	0.5918	0.4082	0.14	0.14	0.5	1000	101.116	4.37866e-24
0.9	0.6727	0.3273	0.6727	0.3273	0.14	0.14	0.7	1000	138.042	3.59232e-32
0.9	0.719	0.281	0.719	0.281	0.14	0.14	0.9	1000	174.162	4.58746e-40
0.9	0.7359	0.2641	0.7359	0.2641	0.14	0.14	1	1000	150.955	5.39522e-35
0.9	0.0871	0.9129	0.0871	0.9129	0.1	0.1	0.22	1000	15.5577	4.23278e-05
0.9	0.5	0.5	0.5	0.5	0.1	0.1	0.5	1000	211.6	3.08884e-48
0.9	0.5918	0.4082	0.5918	0.4082	0.1	0.1	0.7	1000	288.342	5.73275e-65
0.9	0.6464	0.3536	0.6464	0.3536	0.1	0.1	0.9	1000	321.235	3.91094e-72
0.9	0.6667	0.3333	0.6667	0.3333	0.1	0.1	1	1000	338.051	8.50254e-76
0.9	0.0646	0.9354	0.0646	0.9354	0.06	0.06	0.22	1000	36.8028	6.70407e-10
0.9	0.4359	0.5641	0.4359	0.5641	0.06	0.06	0.5	1000	350.298	1.83015e-78
0.9	0.5323	0.4677	0.5323	0.4677	0.06	0.06	0.7	1000	418.35	2.79604e-93
0.9	0.5918	0.4082	0.5918	0.4082	0.06	0.06	0.9	1000	440.317	4.62887e-98
0.9	0.6141	0.3859	0.6141	0.3859	0.06	0.06	1	1000	546.785	3.15538e-121
0.9	0.0513	0.9487	0.0513	0.9487	0.02	0.02	0.22	1000	61.6614	2.07162e-15
0.9	0.3876	0.6124	0.3876	0.6124	0.02	0.02	0.5	1000	482.358	3.28502e-107
0.9	0.4855	0.5145	0.4855	0.5145	0.02	0.02	0.7	1000	673.55	8.45543e-149
0.9	0.5477	0.4523	0.5477	0.4523	0.02	0.02	0.9	1000	735.999	2.22472e-162
0.9	0.5714	0.4286	0.5714	0.4286	0.02	0.02	1	1000	764.23	1.61735e-168
0.9	0.0465	0.9535	0.0465	0.9535	0	0	0.22	1000	70.6966	2.11173e-17
0.9	0.3675	0.6325	0.3675	0.6325	0	0	0.5	1000	599.796	9.28675e-133
0.9	0.4655	0.5345	0.4655	0.5345	0	0	0.7	1000	765.034	1.08158e-168
0.9	0.5286	0.4714	0.5286	0.4714	0	0	0.9	1000	863.039	5.32567e-190
0.9	0.5528	0.4472	0.5528	0.4472	0	0	1	1000	918.298	5.17003e-202
1	0.2929	0.7071	0.2929	0.7071	0.18	0.18	0.22	1000	3.12805	0.0472091
1	0.75	0.25	0.75	0.25	0.18	0.18	0.5	1000	22.931	8.73579e-07
1	0.8039	0.1961	0.8039	0.1961	0.18	0.18	0.7	1000	36.0083	1.00834e-09
1	0.8333	0.1667	0.8333	0.1667	0.18	0.18	0.9	1000	36.2309	8.99368e-10
1	0.8438	0.1562	0.8438	0.1562	0.18	0.18	1	1000	35.2863	1.46147e-09
1	0.134	0.866	0.134	0.866	0.14	0.14	0.22	1000	11.5092	0.000372554
1	0.5918	0.4082	0.5918	0.4082	0.14	0.14	0.5	1000	117.557	1.09318e-27
1	0.6727	0.3273	0.6727	0.3273	0.14	0.14	0.7	1000	152.922	2.00443e-35
1	0.719	0.281	0.719	0.281	0.14	0.14	0.9	1000	201.764	4.326e-46
1	0.7359	0.2641	0.7359	0.2641	0.14	0.14	1	1000	173.168	7.5651e-40
1	0.0871	0.9129	0.0871	0.9129	0.1	0.1	0.22	1000	20.1806	3.68364e-06
1	0.5	0.5	0.5	0.5	0.1	0.1	0.5	1000	252.004	4.76687e-57
1	0.5918	0.4082	0.5918	0.4082	0.1	0.1	0.7	1000	316.642	3.91387e-71
1	0.6464	0.3536	0.6464	0.3536	0.1	0.1	0.9	1000	410.902	1.16878e-91
1	0.6667	0.3333	0.6667	0.3333	0.1	0.1	1	1000	401.977	1.02495e-89
1	0.0646	0.9354	0.0646	0.9354	0.06	0.06	0.22	1000	46.4233	4.86245e-12
1	0.4359	0.5641	0.4359	0.5641	0.06	0.06	0.5	1000	388.764	7.70962e-87
1	0.5323	0.4677	0.5323	0.4677	0.06	0.06	0.7	1000	533.241	2.79008e-118
1	0.5918	0.4082	0.5918	0.4082	0.06	0.06	0.9	1000	615.714	3.20382e-136
1	0.6141	0.3859	0.6141	0.3859	0.06	0.06	1	1000	660.255	6.58558e-146
1	0.0513	0.9487	0.0513	0.9487	0.02	0.02	0.22	1000	78.5991	3.8514e-19
1	0.3876	0.6124	0.3876	0.6124	0.02	0.02	0.5	1000	633.523	4.28712e-140
1	0.4855	0.5145	0.4855	0.5145	0.02	0.02	0.7	1000	812.984	4.06016e-179
1	0.5477	0.4523	0.5477	0.4523	0.02	0.02	0.9	1000	876.65	5.85351e-193
1	0.5714	0.4286	0.5714	0.4286	0.02	0.02	1	1000	913.418	5.94674e-201
1	0.0465	0.9535	0.0465	0.9535	0	0	0.22	1000	94	1.59406e-22
1	0.3675	0.6325	0.3675	0.6325	0	0	0.5	1000	736	2.22383e-162
1	0.4655	0.5345	0.4655	0.5345	0	0	0.7	1000	930	1.4782e-204
1	0.5286	0.4714	0.5286	0.4714	0	0	0.9	1000	1058	2.22273e-232
1	0.5528	0.4472	0.5528	0.4472	0	0	1	1000	1106	8.20699e-243
